# Supplementary material
Source: publisher figshare collection journal article supplement (https://acs.figshare.com/ndownloader/files/4327201)
Supplement: Supplementary file 1 [file 4327201]

# Supporting Information

## Tuning the light absorption of $\text{Cu}_{1.97}\text{S}$ nanocrystals in supercrystal structures

*Ilka Kriegel<sup>1</sup>, Jessica Rodríguez-Fernández<sup>1</sup>, Enrico Da Como<sup>1\*</sup>, Andrey A. Lutich<sup>1</sup>, Johann M. Szeifert<sup>2</sup> and Jochen Feldmann<sup>1</sup>*

<sup>1</sup>Photonics and Optoelectronics Group, Department of Physics and CeNS, Ludwig-Maximilians-University, 80799 Munich, Germany

<sup>2</sup>Department of Chemistry, Ludwig-Maximilians-University, 81377 Munich, Germany

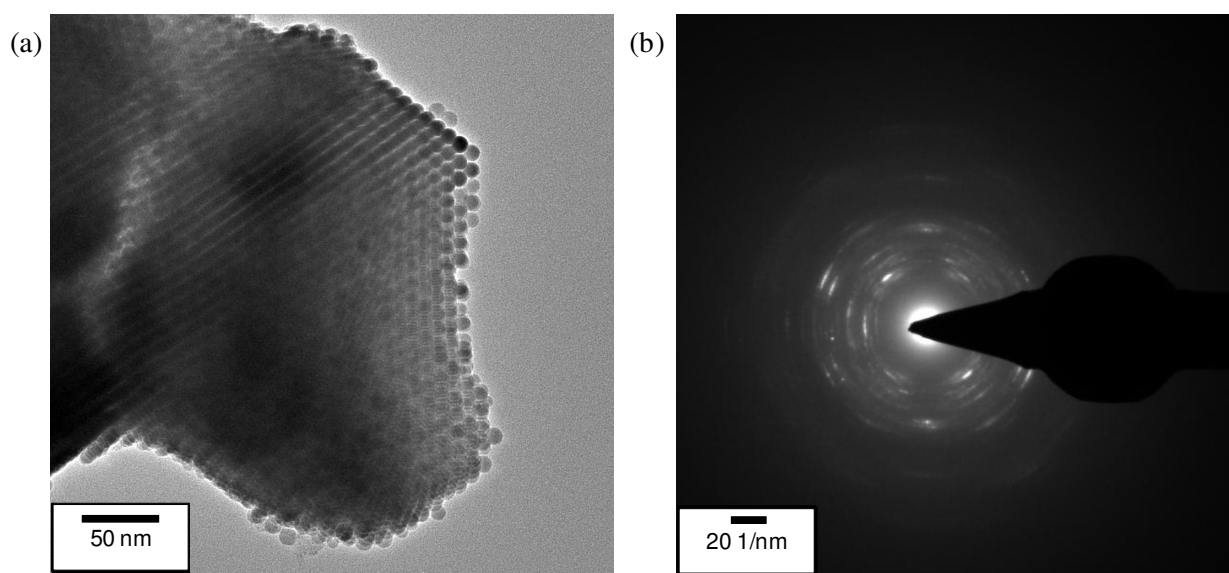

**Figure S1.** (a) HRTEM micrograph of a supercrystal of  $\text{Cu}_{1.97}\text{S}$  nanocrystals. (b) Corresponding selected area electron diffraction (SAED) pattern, indicating that the nanocrystals are arranged in the supercrystal with a preferred orientation.

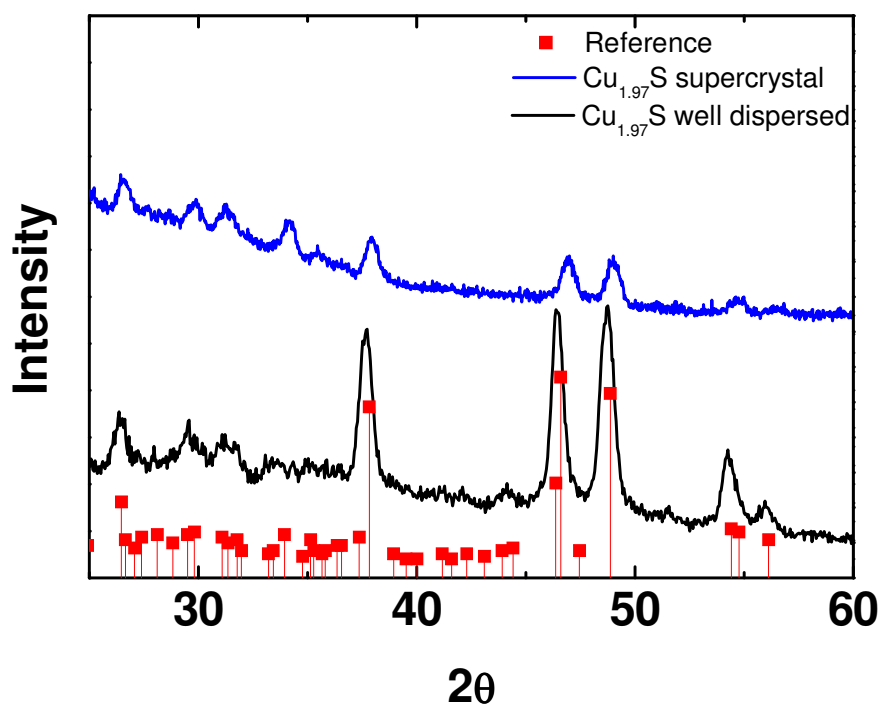

**Figure S2.** Powder XRD patterns of the  $\text{Cu}_{1.97}\text{S}$  supercrystals and the corresponding de-assembled nanocrystals after treatment with oleylamine. The peaks in both samples can be indexed to  $\text{Cu}_{1.97}\text{S}$  *djurleite* (JPCDS 20-0365), confirming that the crystalline structure of the nanocrystals remains unaltered after de-assembly.
